# Supplementary material for: Genotypic Variation in Agronomic Traits and Molecular Markers among Chinese Luobuma (Apocynum spp.) Germplasm Accessions
Source: MDPI journal article supplement (doi:10.3390/agriculture14030332), 2024-02-20
Supplement: s1 [file s1]

# **Genotypic variation in agronomic traits and its assesment molecular markers among chinese Luobuma (*Apocynum* spp.) germplasm accessions**

Yufeng Zhao<sup>1</sup>, Runqiu Feng<sup>1</sup>, Tao Li<sup>1</sup>, Jahufer Mohamed zain zulfiqhar<sup>3</sup>, Li Wang<sup>2</sup>, Jiyu Zhang<sup>1\*</sup>

*1.State Key Laboratory of Grassland Agro-ecosystems, Key Laboratory of Grassland Livestock Industry Innovation, Ministry of Agriculture and Rural Affairs, College of Pastoral Agriculture Science and Technology, Lanzhou University, Lanzhou, 730020, China*

*2. Altay GAUBAU Tea Co., Ltd., Altay 836509, Xinjiang, China*

*3. AgResearch, Grasslands Research Centre, Private Bag 11008, Palmerston North, New Zealand*

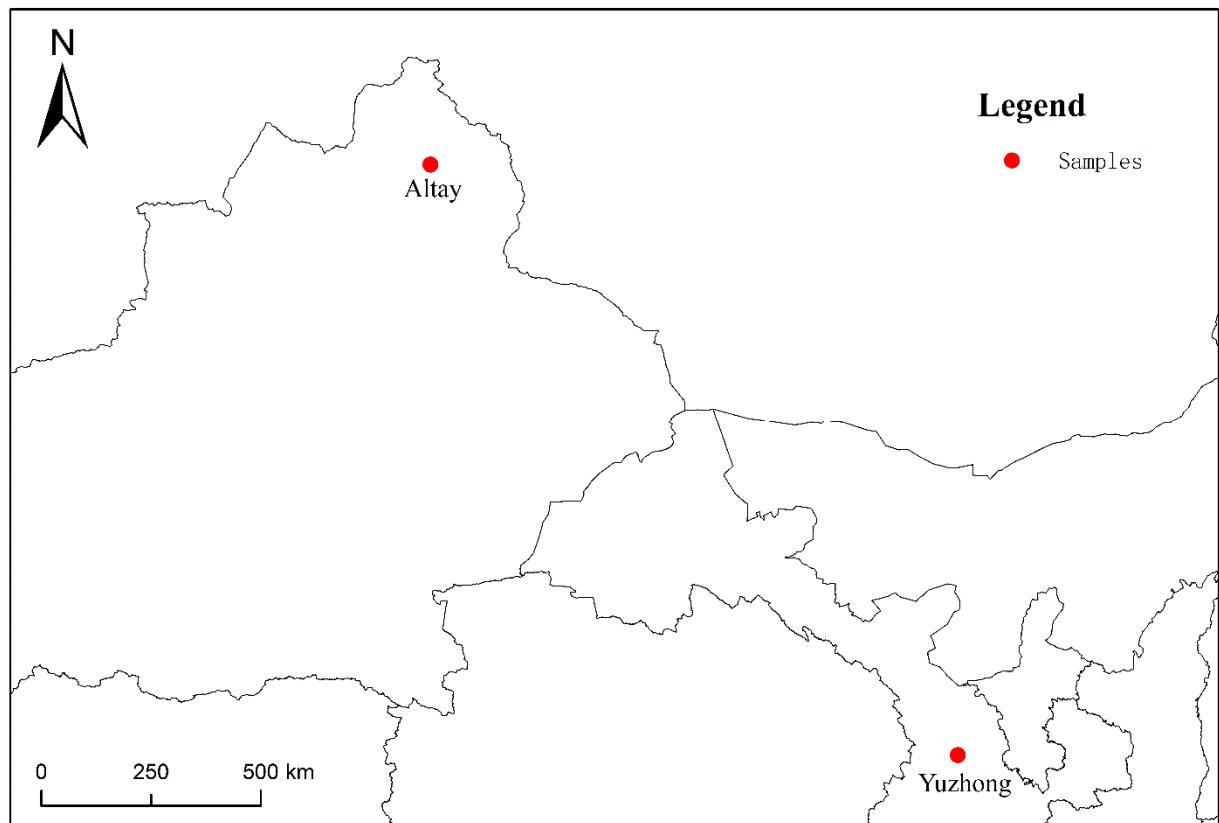

Figure S1. Distribution map of sampling locations.

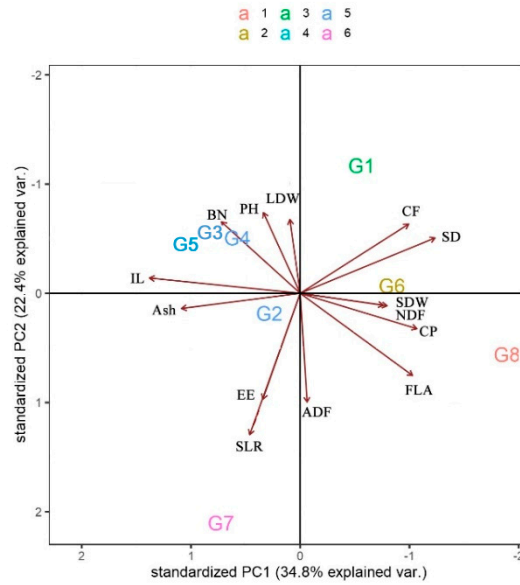

Figure S2. Principal component analysis of agronomic traits in different genotypes of *Apocynum* spp. and *Poacynum* spp. during early flowering stage from 2017-2019 at Altay.

Different color represents different group.

PH, plant height; SD, stem diameter; IL, internode length; BN, branch number; LDW, leaf dry weight; SDW, stem dry weight; SLR, stem to leaf ratio; ns, no significant; CP, crude protein; NDF, neutral detergent fibre; ADF, acid detergent fiber; EE, ether extract; CF, crude fiber; FLA, flavone.

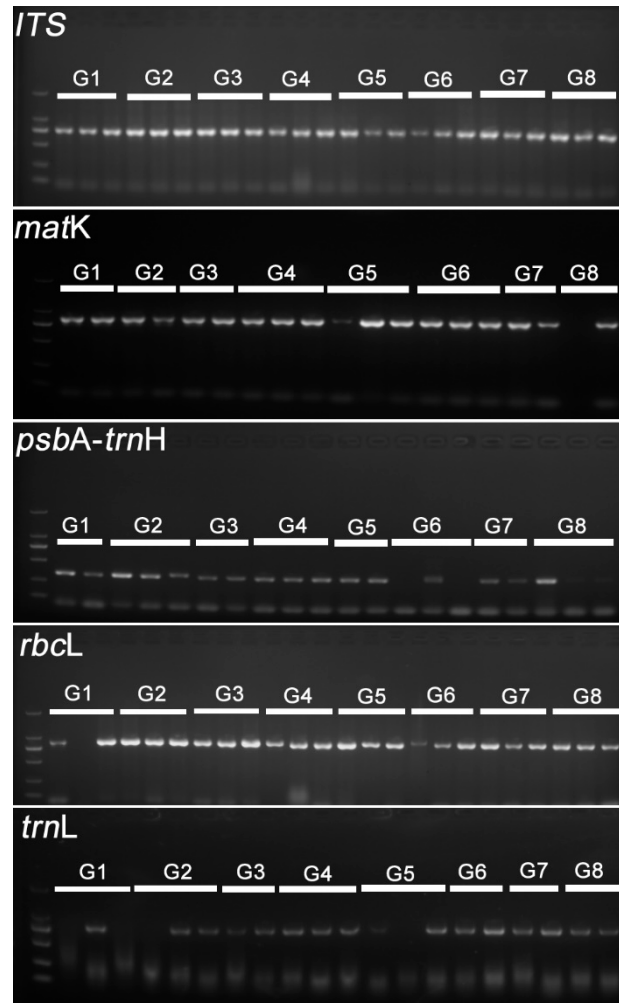

Figure S3. gel pictures of five molecular markers for 8 genotypes.

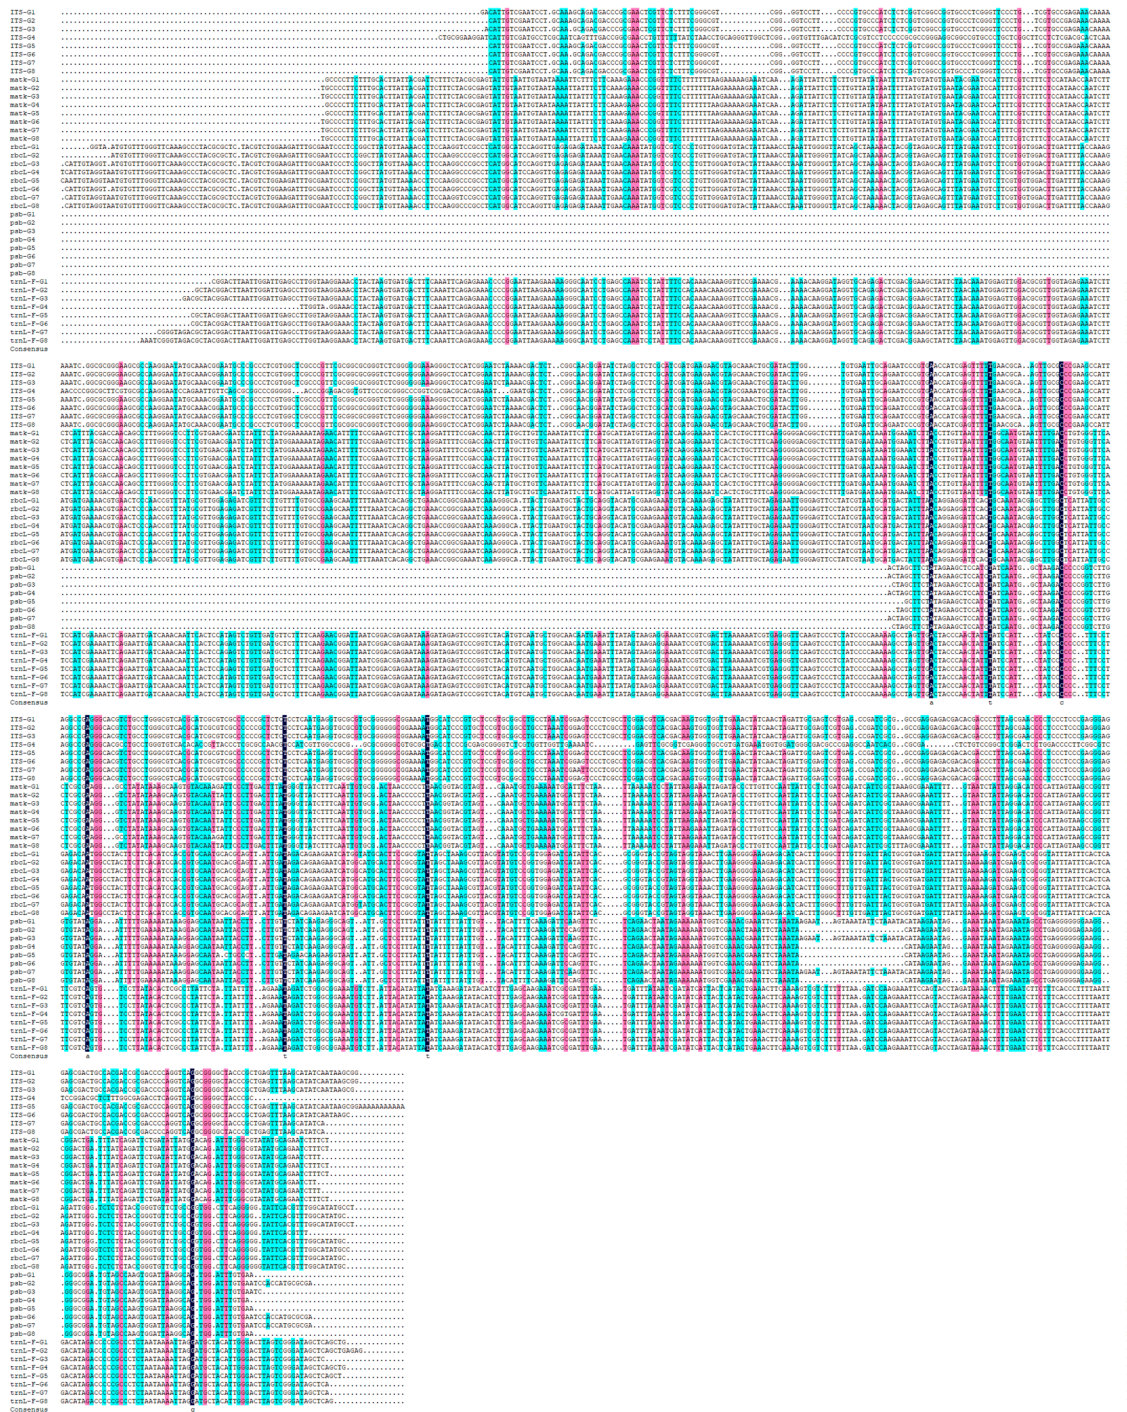

Figure S4. Comparison of sequences for eight genotypes ITS, matK, psbA-trnH, rbcL, trnL-F.

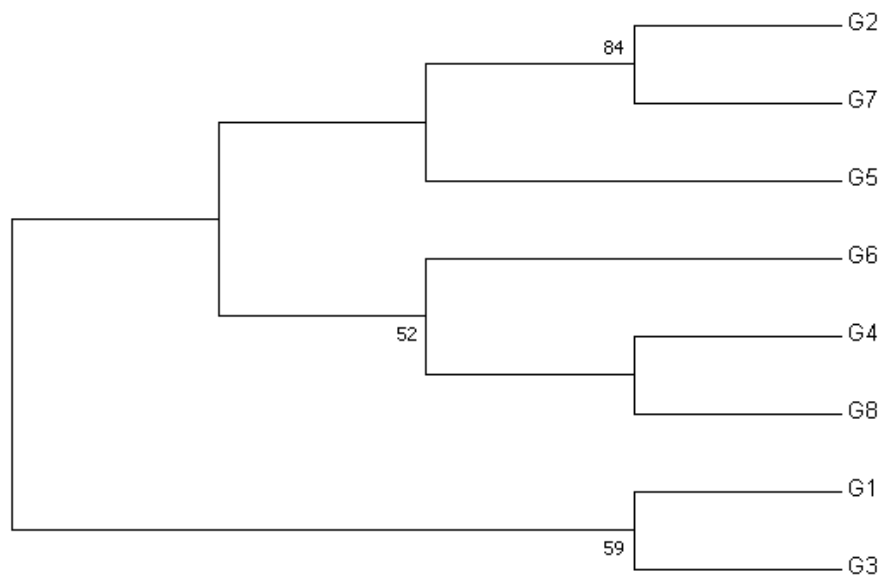

Figure S5. Neighbor-joining (NJ) tree for different phenotypes using matK + psbA-trnH + rbcL + trnL markers.

Table S1.

Trait mean, range, least significant differences ( $LSD_{0.05}$ ), genotypic ( $\sigma^2_g$ ), year ( $\sigma^2_y$ ), accession-by-year interaction ( $\sigma^2_{gy}$ ), and experimental error ( $\sigma^2_\epsilon$ ) variance components, and associated standard errors ( $\pm SE$ ), estimated from 8 accessions, for yield related traits at the early flowering stage from 2017 to 2019 at Altay.

|                     | PH (mm)             | SD (mm)          | IL (mm)         | BN               | LDW (g)            | SDW (g)          | SLR               |
|---------------------|---------------------|------------------|-----------------|------------------|--------------------|------------------|-------------------|
| Mean                | 991.0               | 21.45            | 60.5            | 5.52             | 26.41              | 25.35            | 0.94              |
| Range               | 832.5-1116.1        | 18.3-24.6        | 50.3-65.4       | 3.86-7.33        | 22.08-33.83        | 21.18-27.81      | 0.85-1.20         |
| $LSD_{0.05}$        | 59.78               | 3.05             | 4.19            | 12.64            | 35.07              | 16.63            | 0.72              |
| $\sigma^2_g$        | 338.59 $\pm$ 99.00  | 1.005 $\pm$ 0.16 | 1.86 $\pm$ 0.35 | 17.84 $\pm$ 2.18 | 127.56 $\pm$ 23.08 | 15.40 $\pm$ 2.94 | 0.03 $\pm$ 0.006  |
| $\sigma^2_y$        | ns                  | ns               | ns              | ns               | ns                 | ns               | 0.004 $\pm$ 0.002 |
| $\sigma^2_{gy}$     | 161.08 $\pm$ 58.45  | 0.20 $\pm$ 0.05  | 0.46 $\pm$ 0.13 | 1.02 $\pm$ 0.40  | 21.71 $\pm$ 7.76   | 15.40 $\pm$ 2.94 | 0.03 $\pm$ 0.006  |
| $\sigma^2_\epsilon$ | 1376.12 $\pm$ 72.32 | 0.19 $\pm$ 0.01  | 1.57 $\pm$ 0.08 | 11.02 $\pm$ 0.58 | 82.45 $\pm$ 7.17   | 23.66 $\pm$ 2.58 | 0.05 $\pm$ 0.005  |

\*PH, plant height; SD, stem diameter; IL, internode length; BN, branch number; LDW, leaf dry weight;

SDW, stem dry weight; SLR, stem to leaf ratio; ns, no significant.

Table S2

Trait average, range, least significant differences ( $LSD_{0.05}$ ), genotypic ( $\sigma^2_g$ ), year ( $\sigma^2_y$ ), genotype  $\times$  year interaction ( $\sigma^2_{gy}$ ), and experimental error ( $\sigma^2_\epsilon$ ) variance components, and associated standard errors ( $\pm SE$ ), estimated from 8 genotypes, evaluated yield related traits at early flowering stage from 2018 to 2019 at Yuzhong.

|                     | PH (mm)            | SD (mm)         | IL (mm)         | BN              | LDW (g)          | SDW (g)          | SLR               |
|---------------------|--------------------|-----------------|-----------------|-----------------|------------------|------------------|-------------------|
| Mean                | 834.9              | 4.8             | 41.0            | 3.91            | 24.82            | 23.25            | 0.91              |
| Range               | 798.9-891.8        | 4.5-5.3         | 37.8-46.3       | 3.27-4.43       | 22.55-26.45      | 20.81-25.47      | 0.86-0.95         |
| $LSD_{0.05}$        | 62.95              | 2.50            | 2.42            | 4.16            | 17.70            | 18.61            | 0.24              |
| $\sigma^2_g$        | 427.75 $\pm$ 64.76 | 0.38 $\pm$ 0.13 | 0.58 $\pm$ 0.13 | 1.87 $\pm$ 0.27 | 27.14 $\pm$ 8.71 | 30.47 $\pm$ 9.09 | 0.003 $\pm$ 0.001 |
| $\sigma^2_y$        | ns                 | ns              | ns              | ns              | ns               | ns               | ns                |
| $\sigma^2_{gy}$     | 25.73 $\pm$ 12.01  | 0.09 $\pm$ 0.02 | 0.13 $\pm$ 0.05 | 0.26 $\pm$ 0.10 | 11.06 $\pm$ 4.21 | 13.08 $\pm$ 4.64 | 0.005 $\pm$ 0.002 |
| $\sigma^2_\epsilon$ | 161.04 $\pm$ 16.71 | 8.40 $\pm$ 0.78 | 0.44 $\pm$ 0.05 | 1.89 $\pm$ 0.18 | 30.16 $\pm$ 3.12 | 30.05 $\pm$ 3.11 | 0.05 $\pm$ 0.005  |

\*PH, plant height; SD, stem diameter; IL, internode length; BN, branch number; LDW, leaf dry weight; SDW, stem dry weight; SLR, stem to leaf ratio; ns, no significant.



Table S3

Nutritional quality average, range, least significant differences ( $LSD_{0.05}$ ), genotypic ( $\sigma^2_g$ ), year ( $\sigma^2_y$ ) and genotype with year ( $\sigma^2_{gy}$ ), and experimental error ( $\sigma^2_\epsilon$ ) variance components, and associated standard errors ( $\pm SE$ ), estimated from 8 genotypes, evaluated in early flowering stage at Altay.

|                     | CP (%)          | NDF (%)          | ADF (%)           | EE (%)            | CF (%)           | Ash (%)         | FLA (mg/100g)    |
|---------------------|-----------------|------------------|-------------------|-------------------|------------------|-----------------|------------------|
| Mean                | 14.21           | 33.97            | 79.09             | 8.89              | 22.88            | 9.77            | 2.64             |
| Range               | 12.97-16.88     | 27.63-36.52      | 71.89-84.81       | 6.67-15.17        | 18.63-26.12      | 9.1-10.85       | 2.37-2.99        |
| $LSD_{0.05}$        | 3.42            | 5.22             | 30.94             | 17.56             | 20.12            | 3.23            | 0.69             |
| $\sigma^2_g$        | ns              | ns               | 98.48 $\pm$ 22.82 | 23.85 $\pm$ 10.94 | 42.28 $\pm$ 9.56 | 1.01 $\pm$ 0.24 | 0.04 $\pm$ 0.01  |
| $\sigma^2_y$        | ns              | ns               | ns                | ns                | ns               | ns              | ns               |
| $\sigma^2_{gy}$     | 2.14 $\pm$ 0.86 | ns               | ns                | ns                | ns               | ns              | ns               |
| $\sigma^2_\epsilon$ | 2.14 $\pm$ 0.44 | 14.51 $\pm$ 2.51 | 73.45 $\pm$ 12.42 | 91.91 $\pm$ 15.20 | 34.59 $\pm$ 5.85 | 0.80 $\pm$ 0.14 | 0.04 $\pm$ 0.008 |

\*CP, crude protein; NDF, neutral detergent fiber; ADF, acid detergent fiber; EE, ether extract; CF, crude fiber;

FLA, flavone; ns, no significant.

Table S4

Nutritional quality average, range, least significant differences ( $LSD_{0.05}$ ), genotypic ( $\sigma^2_g$ ), year ( $\sigma^2_y$ ) and genotype with year ( $\sigma^2_{gy}$ ), and experimental error ( $\sigma^2_\epsilon$ ) variance components, and associated standard errors ( $\pm SE$ ), estimated from 8 genotypes, evaluated in full flowering stage at Altay.

|                     | CP (%)          | NDF (%)          | ADF (%)          | EE (%)          | CF (%)           | Ash (%)           | FLA (mg/100g)    |
|---------------------|-----------------|------------------|------------------|-----------------|------------------|-------------------|------------------|
| Mean                | 15.7            | 32.24            | 72.11            | 7.19            | 16.08            | 11.38             | 2.75             |
| Range               | 13.07-18.26     | 24.67-35.90      | 68.97-78.74      | 6.63-7.92       | 11.23-17.71      | 8.02-17.62        | 2.49-3.35        |
| $LSD_{0.05}$        | 3.6             | 16.04            | 14.31            | 2.86            | 11.6             | 16.41             | 1.6              |
| $\sigma^2_g$        | 0.02 $\pm$ 0.01 | 25.97 $\pm$ 6.99 | 19.70 $\pm$ 6.23 | 0.55 $\pm$ 0.23 | 13.23 $\pm$ 3.19 | 21.57 $\pm$ 9.96  | 0.28 $\pm$ 0.04  |
| $\sigma^2_y$        | ns              | ns               | ns               | ns              | ns               | ns                | ns               |
| $\sigma^2_{gy}$     | 2.51 $\pm$ 0.87 | ns               | ns               | ns              | ns               | ns                | 0.04 $\pm$ 0.01  |
| $\sigma^2_\epsilon$ | 1.72 $\pm$ 0.35 | 29.75 $\pm$ 5.04 | 31.78 $\pm$ 5.38 | 1.01 $\pm$ 0.21 | 11.24 $\pm$ 1.98 | 76.58 $\pm$ 12.95 | 0.01 $\pm$ 0.004 |

\*CP, crude protein; NDF, neutral detergent fibre; ADF, acid detergent fiber; EE, ether extract; CF, crude fiber;

FLA, flavone; ns, no significant.

Table S5

Nutritional quality average, range, least significant differences ( $LSD_{0.05}$ ), genotypic ( $\sigma^2_g$ ), and experimental error ( $\sigma^2_\epsilon$ ) variance components, and associated standard errors ( $\pm SE$ ), estimated from 8 genotypes, evaluated in early flowering stage at Yuzhong.

|                     | CP (%)          | NDF (%)         | ADF (%)          | EE (%)          | CF (%)           | Ash (%)           | FLA (mg/100g)     |
|---------------------|-----------------|-----------------|------------------|-----------------|------------------|-------------------|-------------------|
| Mean                | 18.87           | 22.79           | 63.98            | 5.11            | 24.52            | 14.8              | 1.78              |
| Range               | 16.92-20.15     | 20.09-26.57     | 60.99-66.20      | 4.18-6.24       | 20.42-29.83      | 11.17-15.90       | 1.54-2.35         |
| $LSD_{0.05}$        | 2.02            | 5.6             | 14.59            | 1.58            | 15.41            | 22.58             | 0.39              |
| $\sigma^2_g$        | ns              | ns              | 16.64 $\pm$ 7.05 | 0.19 $\pm$ 0.08 | ns               | 35.39 $\pm$ 17.16 | 0.002 $\pm$ 0.001 |
| $\sigma^2_\epsilon$ | 0.24 $\pm$ 0.11 | 1.69 $\pm$ 0.45 | 16.64 $\pm$ 7.34 | 0.19 $\pm$ 0.06 | 14.12 $\pm$ 7.02 | 34.76 $\pm$ 17.12 | 0.02 $\pm$ 0.01   |

\*CP, crude protein; NDF, neutral detergent fibre; ADF, acid detergent fiber; EE, ether extract; CF, crude fiber;

FLA, flavone; ns, no significant.

Table S6

Correlation analysis of characters of *Apocynum* and *Poacynum* of different genotypes during early flowering stage from 2017 to 2018 at Yuzhong

| Trait | Trait |       |       |       |        |       |        |       |        |       |       |        |       |
|-------|-------|-------|-------|-------|--------|-------|--------|-------|--------|-------|-------|--------|-------|
|       | SD    | IL    | BN    | LDW   | SDW    | SLR   | NDF    | ADF   | CP     | CF    | Ash   | EE     | FLA   |
| PH    | -0.21 | 0.21  | 0.16  | 0.41  | 0.61   | 0.84* | -0.56  | -0.27 | 0.40   | 0.07  | 0.02  | 0.10   | 0.28  |
| SD    |       | -0.49 | -0.51 | 0.10  | 0.04   | 0.09  | 0.18   | -0.54 | -0.53  | 0.12  | 0.21  | -0.62  | -0.06 |
| IL    |       |       | 0.53  | 0.45  | 0.33   | -0.22 | 0.51   | -0.22 | 0.01*  | 0.64  | -0.06 | 0.96** | 0.02  |
| BN    |       |       |       | 0.63* | 0.63*  | 0.09  | 0.02   | 0.17  | 0.55   | 0.56  | 0.20  | 0.59   | 0.36  |
| LDW   |       |       |       |       | 0.93** | 0.43  | 0.10   | -0.29 | 0.01** | 0.75  | 0.52  | 0.40   | 0.28  |
| SDW   |       |       |       |       |        | 0.66* | -0.13  | -0.23 | 0.25   | 0.64  | 0.42  | 0.27   | 0.27  |
| SLR   |       |       |       |       |        |       | -0.66* | -0.14 | 0.41   | -0.10 | 0.35  | -0.30  | 0.19  |
| NDF   |       |       |       |       |        |       |        | -0.20 | -0.47  | 0.45  | 0.18  | 0.49   | -0.50 |
| ADF   |       |       |       |       |        |       |        |       | 0.20   | -0.42 | 0.10  | 0.06   | -0.36 |
| CP    |       |       |       |       |        |       |        |       |        | -0.19 | 0.02  | 0.03   | 0.24  |
| CF    |       |       |       |       |        |       |        |       |        |       | 0.00  | 0.57   | 0.27  |
| Ash   |       |       |       |       |        |       |        |       |        |       |       | -0.01  | -0.32 |
| EE    |       |       |       |       |        |       |        |       |        |       |       |        | -0.09 |

\*,\*\* Significant at the 0.05 and 0.01 probability levels, respectively.

PH, plant height; SD, stem diameter; IL, internode length; BN, branch number; LDW, leaf dry weight; SDW, stem dry weight; SLR, stem to leaf ratio; ns, no significant; CP, crude protein; NDF, neutral detergent fibre; ADF, acid detergent fiber; EE, ether extract; CF, crude fiber; FLA, flavone.

Table S7. Primer information of different gene segments

| Sequence name    | Primer sequence (5'-3')     | Annealing<br>temperature (°C) | Length (bp) |
|------------------|-----------------------------|-------------------------------|-------------|
| <i>ITS</i>       | F:GGAAGKARAAGTCGTAACAAGG    | 53                            | ~640        |
|                  | R:RGTTTCTTTTCCTCCGCTTA      |                               |             |
| <i>psbA-trnH</i> | F:GTTATGCATGAACGTAATGCTC    | 60                            | ~320        |
|                  | R:CGCGCATGGTGGATTACAAATC    |                               |             |
| <i>matK</i>      | F:CCCRTYCATCTGGAAATCTTGGTTC | 52                            | ~710        |
|                  | R:GCTRTRATAATGAGAAAGATTCTGC |                               |             |
| <i>trnL-F</i>    | F:CGAAATCGGTAGACGCTACG      | 53                            | ~640        |
|                  | R:ATTTGAACTGGTGACACGAG      |                               |             |
| <i>rbcL</i>      | F:AGACCTWTTTGAAGAAGGTTTCWGT | 53                            | ~750        |
|                  | R:TCGGTYAGAGCRGGCATRTGCCA   |                               |             |

Table S8. Sequences information of five sequences

| sequence         | Aligned length (bp) | Average of GC content (%) | Number of variable sites |
|------------------|---------------------|---------------------------|--------------------------|
| <i>ITS</i>       | 683                 | 61.05                     | 8                        |
| <i>psbA-trnH</i> | 314                 | 35.68                     | 37                       |
| <i>rbcL</i>      | 777                 | 43.86                     | 5                        |
| <i>trnL-F</i>    | 736                 | 38.19                     | 8                        |
| <i>matK</i>      | 728                 | 34.78                     | 7                        |
